# Supplementary material for: Structure and Function of the Zinc Binding Protein ZrgA from Vibrio cholerae
Source: MDPI journal article supplement (doi:10.3390/ijms24010548), 2022-12-29
Supplement: s1 [file s1]

## Supplementary Information

**Supplementary Table S1.** Strains used in this study.

| Strain/plasmid     | Genotype/ description                                                                                                                                                  | Source                                                                   |
|--------------------|------------------------------------------------------------------------------------------------------------------------------------------------------------------------|--------------------------------------------------------------------------|
| Strains            |                                                                                                                                                                        |                                                                          |
| Vc O395            | <i>V. cholerae</i> Wild-type, Sm <sup>r</sup>                                                                                                                          | A gift from Dr. Fitnat Yildiz at the University of California Santa Cruz |
|                    | Vc 0395 mutant, $\Delta znuA$ , Sm <sup>r</sup>                                                                                                                        | This work                                                                |
|                    | Vc O395 mutant, $\Delta znuA$ <i>zrgA</i> $\Delta 124-184$ , Sm <sup>r</sup>                                                                                           | This work                                                                |
|                    | Vc O395 mutant, $\Delta znuA$ , $\Delta zrgA$ Sm <sup>r</sup>                                                                                                          | This work                                                                |
| Sm10 $\lambda$ pir | <i>E. coli</i> , with derivative RP4 plasmid integrated, containing the $\lambda$ pir for replication of R6K suicide vector, for integration into <i>V. cholerae</i> . | A gift from Dr. Fitnat Yildiz at the University of California Santa Cruz |
| Plasmids           |                                                                                                                                                                        |                                                                          |
| pCDF-Duet1         | Expression vector, Sm <sup>r</sup>                                                                                                                                     | Novagen                                                                  |
|                    | pCDF-Duet1 with <i>V. cholerae</i> <i>zrgA</i> , Sm <sup>r</sup>                                                                                                       | This work                                                                |
|                    | pCDF-Duet1, with <i>V. cholerae</i> <i>zrgA</i> mutation lacking $\Delta 124-184$ , Sm <sup>r</sup>                                                                    | This work                                                                |
|                    | pCDF-Duet1, with <i>V. cholerae</i> <i>zrgA</i> mutation lacking $\Delta 124-183$ , Sm <sup>r</sup>                                                                    | This work                                                                |
|                    | pCDF-Duet1, with <i>V. cholerae</i> <i>zrgA</i> mutation lacking $\Delta 124-180$ , Sm <sup>r</sup>                                                                    | This work                                                                |
| pGP704sacB28       | pGP704sacB28, R6K suicide plasmid, Ap <sup>r</sup>                                                                                                                     | A gift from Dr. Fitnat Yildiz at the University of California Santa Cruz |

|  |                                                                                                                                                                                   |           |
|--|-----------------------------------------------------------------------------------------------------------------------------------------------------------------------------------|-----------|
|  | pGP704sacB28, with upstream and downstream flanking regions comprising 3 amino acids forward and reverse of <i>znuA</i> gene along with 500-600bp flanking gene, Amp <sup>r</sup> | This work |
|  | pGP704sacB28, with upstream and downstream 600bp flanking sequences of <i>zrgA</i> , Amp <sup>r</sup>                                                                             | This work |
|  | pGP704sacB28, with upstream and downstream 600bp flanking sequences of <i>zrgA</i> flexible loop region 124-184, Amp <sup>r</sup>                                                 | This work |

**Supplementary Table S2.** Primers used in this study.

| Primer               | Primer sequence 5' to 3'                        |
|----------------------|-------------------------------------------------|
| VcholZrgA_pdcf_fow   | gtataagaaggagatatacatatgcattaccaacaatgattg      |
| VcholZrgA_pdcf_rev   | gtttctttaccagactcgagggtttacagtttgataagcgtttg    |
| ZrgA_Del 123-184 FWD | ggctcattcaccgctcaatatcagttccac                  |
| ZrgA_Del 123-184 REV | accataagcgtggctgtgttggtactcttc                  |
| ZrgA_del_123-180 FWD | gagcatcaacacggctcattcaccgctcaa                  |
| ZrgA_del_123-183 FWD | cacggctcattcaccgctcaatatcagttc                  |
| Vc_ZnuA_Del_A        | gatccacgaagcttccatggaagcaagtcgggtctttgtaataaagc |
| Vc_ZnuA_Del_B2       | taagattgggacaaacacgctctcgataacatggtcgcaaaact    |
| Vc_ZnuA_Del_C2       | tggcgaccatgggtatcgagagcgtgtttgtccaatcttaagtcg   |
| Vc_ZnuA_Del_D2       | tagaaccgggtgacgtcaccacaactcgtgttgctcaaaagcc     |
| Vc_ZrgA_del_A        | atccacgaagcttccatggttccaacagtgattgcgctttgt      |
| Vc_ZrgA_del_B        | tgttttattaggagtttttctgccaccgctcgaggga           |
| Vc_ZrgA_del_C        | acctatcccagcgggtggcagaaaaactcctaataaaacaaaaa    |
| Vc_ZrgA_del_D        | tatctagaaccgggtgacgtcacccatcaatcacatcgggtga     |
| ZrgA_Mut_124-184_A   | gatccacgaagcttccatggcaagcggcttaagtcactgc        |
| ZrgA_Mut_124-184_B2  | aacacagccacgcttatggtggctcattcaccgctcaatat       |
| ZrgA_Mut_124-184_C2  | tattgagcggatgaatgagccaccataagcgtggctgtg         |
| ZrgA_Mut_124-184_D2  | tagaaccgggtgacgtcaccaccaccacaagcaagggttga       |
| FWD_Vc_ZnuA_Seq      | tgttgataaaaagccagcgtgtctcggc                    |
| REV_Vc_ZnuA_Seq      | cattagtcgctaaagccatttcgagact                    |
| Vc_ZrgA_Seq_FWD      | tcacgggtttattcagtaaagcgttggc                    |

|                     |                                |
|---------------------|--------------------------------|
| Vc_ZrgA_Seq_REV     | cttgattcagcaaaatctgtaatcgcccc  |
| FWD_Vc_ZrgA_mut_Seq | ggtggaaaatatagcctatatggtcggcg  |
| REV_Vc_ZrgA_mut_Seq | ggcctaaaaaccagtgcagtggatattgcc |

**Table S3.** Properties of refined zinc sites and ligands.

| Site | Chain | Occ. | B-factor | Anom.<br>Density<br>(rmsd, $\sigma$ ) | Ligand* (Distance,<br>$\text{\AA}$ ) |
|------|-------|------|----------|---------------------------------------|--------------------------------------|
| 1    | A     | 1.0  | 32.9     | 12.1                                  | H35 N $\epsilon$ (2.0)               |
|      |       |      |          |                                       | H36 N $\epsilon$ (2.0)               |
|      |       |      |          |                                       | E66 O $\epsilon$ 1 (2.1)             |
|      |       |      |          |                                       | E66 O $\epsilon$ 2 (2.1)             |
|      |       |      |          |                                       | H <sub>2</sub> O (2.1)               |
|      | B     | 1.0  | 40.0     | 10.5                                  | H35 N $\epsilon$ (2.1)               |
|      |       |      |          |                                       | H36 N $\epsilon$ (2.0)               |
|      |       |      |          |                                       | E66 O $\epsilon$ 1 (2.1)             |
|      |       |      |          |                                       | E66 O $\epsilon$ 2 (2.1)             |
|      |       |      |          |                                       | H <sub>2</sub> O (2.1)               |
|      | C     | 1.0  | 31.3     | 11.5                                  | H35 N $\epsilon$ (1.9)               |
|      |       |      |          |                                       | H36 N $\epsilon$ (2.0)               |
|      |       |      |          |                                       | E66 O $\epsilon$ 1 (2.0)             |
|      |       |      |          |                                       | H <sub>2</sub> O (2.1)               |
|      | D     | 1.0  | 43.5     | 12.1                                  | H35 N $\epsilon$ (1.9)               |
|      |       |      |          |                                       | H36 N $\epsilon$ (1.9)               |
|      |       |      |          |                                       | E66 O $\epsilon$ 1 (2.1)             |
|      |       |      |          |                                       | E66 O $\epsilon$ 2 (2.1)             |
|      | E     | 0.43 | 81.1     | 4.7                                   | H35 N $\epsilon$ (2.3)               |
|      |       |      |          |                                       | H36 N $\epsilon$ (1.8)               |
|      |       |      |          |                                       | E66 O $\epsilon$ 1 (2.0)             |
|      |       |      |          |                                       | E66 O $\epsilon$ 2 (2.1)             |
|      | F     | 0.75 | 43.1     | 7.9                                   | H35 N $\epsilon$ (1.9)               |
|      |       |      |          |                                       | H36 N $\epsilon$ (2.0)               |
|      |       |      |          |                                       | E66 O $\epsilon$ 1 (2.1)             |
|      |       |      |          |                                       | E66 O $\epsilon$ 2 (2.1)             |
|      |       |      |          |                                       | H <sub>2</sub> O (2.1)               |
| 2    | A     | 1.0  | 33.5     | 10.3                                  | E83 O $\epsilon$ 1 (2.0)             |
|      |       |      |          |                                       | H86 N $\epsilon$ (2.0)               |
|      |       |      |          |                                       | H87 N $\epsilon$ (2.0)               |
|      |       |      |          |                                       | E79' (D) O $\epsilon$ 1 (2.1)        |
|      |       |      |          |                                       | E79' (D) O $\epsilon$ 2 (2.1)        |
|      | B     | 1.0  | 39.6     | 9.8                                   | E83 O $\epsilon$ 1 (2.0)             |
|      |       |      |          |                                       | H86 N $\epsilon$ (1.9)               |
|      |       |      |          |                                       | H87 N $\epsilon$ (1.9)               |

|    |   |      |      |      |                                |
|----|---|------|------|------|--------------------------------|
|    |   |      |      |      | E79'' (F) O $\epsilon$ 1 (2.2) |
|    |   |      |      |      | E79'' (F) O $\epsilon$ 2 (2.2) |
|    | C | 1.0  | 38.5 | 9.0  | E83 O $\epsilon$ 1 (2.0)       |
|    |   |      |      |      | H86 N $\epsilon$ (2.0)         |
|    |   |      |      |      | H87 N $\epsilon$ (1.9)         |
|    |   |      |      |      | E79' (E) O $\epsilon$ 1 (2.1)  |
|    |   |      |      |      | E79' (E) O $\epsilon$ 2 (2.1)  |
|    |   |      |      |      |                                |
|    | D | 1.0  | 33.4 | 11.1 | E83 O $\epsilon$ 1 (2.1)       |
|    |   |      |      |      | E83 O $\epsilon$ 2 (2.1)       |
|    |   |      |      |      | H86 N $\epsilon$ (2.0)         |
|    |   |      |      |      | H87 N $\epsilon$ (2.0)         |
|    |   |      |      |      | E79' (A) O $\epsilon$ 1 (2.1)  |
|    |   |      |      |      | E79' (A) O $\epsilon$ 2 (2.1)  |
|    | E | 1.0  | 33.2 | 9.3  | E83 O $\epsilon$ 1 (2.1)       |
|    |   |      |      |      | H86 N $\epsilon$ (1.9)         |
|    |   |      |      |      | H87 N $\epsilon$ (2.0)         |
|    |   |      |      |      | E79' (C) O $\epsilon$ 1 (2.1)  |
|    |   |      |      |      | E79' (C) O $\epsilon$ 2 (2.1)  |
|    | F | 1.0  | 49.4 | 7.2  | E83 O $\epsilon$ 1 (2.0)       |
|    |   |      |      |      | H86 N $\epsilon$ (2.0)         |
|    |   |      |      |      | H87 N $\epsilon$ (2.0)         |
|    |   |      |      |      | E79'' (B) O $\epsilon$ 1 (1.7) |
|    |   |      |      |      | E79'' (B) O $\epsilon$ 2 (2.7) |
| 3  | A | 1.0  | 34.6 | 10.9 | H49 N $\delta$ (2.1)           |
|    |   |      |      |      | H194 N $\epsilon$ (2.1)        |
|    |   |      |      |      | E196 O $\epsilon$ 1 (2.1)      |
|    |   |      |      |      | E196 O $\epsilon$ 2 (2.1)      |
|    |   |      |      |      | H118' (D) N $\delta$ (2.0)     |
|    | B | 0.72 | 51.4 | 5.5  | H49 N $\delta$ (2.0)           |
|    |   |      |      |      | H194 N $\epsilon$ (2.3)        |
|    |   |      |      |      | E196 O $\epsilon$ 1 (2.1)      |
|    |   |      |      |      | H <sub>2</sub> O (2.1)         |
|    | C | 0.35 | 54.0 | 4.2  | H194 N $\epsilon$ (2.0)        |
|    |   |      |      |      | E196 O $\epsilon$ 1 (2.1)      |
|    | D | 0.43 | 52.8 | 3.0  | H194 N $\epsilon$ (2.0)        |
|    |   |      |      |      | E196 O $\epsilon$ 1 (2.1)      |
|    | E | 0.57 | 60.0 | 5.3  | H49 N $\delta$ (2.3)           |
|    |   |      |      |      | H194 N $\epsilon$ (2.0)        |
|    |   |      |      |      | E196 O $\epsilon$ 1 (2.1)      |
|    |   |      |      |      | E196 O $\epsilon$ 2 (2.1)      |
|    |   |      |      |      | H118' (C) N $\delta$ (2.1)     |
|    | F | 0.89 | 63.0 | 6.6  | H49 N $\delta$ (2.0)           |
|    |   |      |      |      | H194 N $\delta$ (2.0)          |
|    |   |      |      |      | E196 O $\epsilon$ 1 (2.0)      |
| 3b | C | 0.50 | 55.1 | 3.4  | H194 N $\delta$ (2.0)          |
|    |   |      |      |      | D50 O $\delta$ 1 (2.1)         |



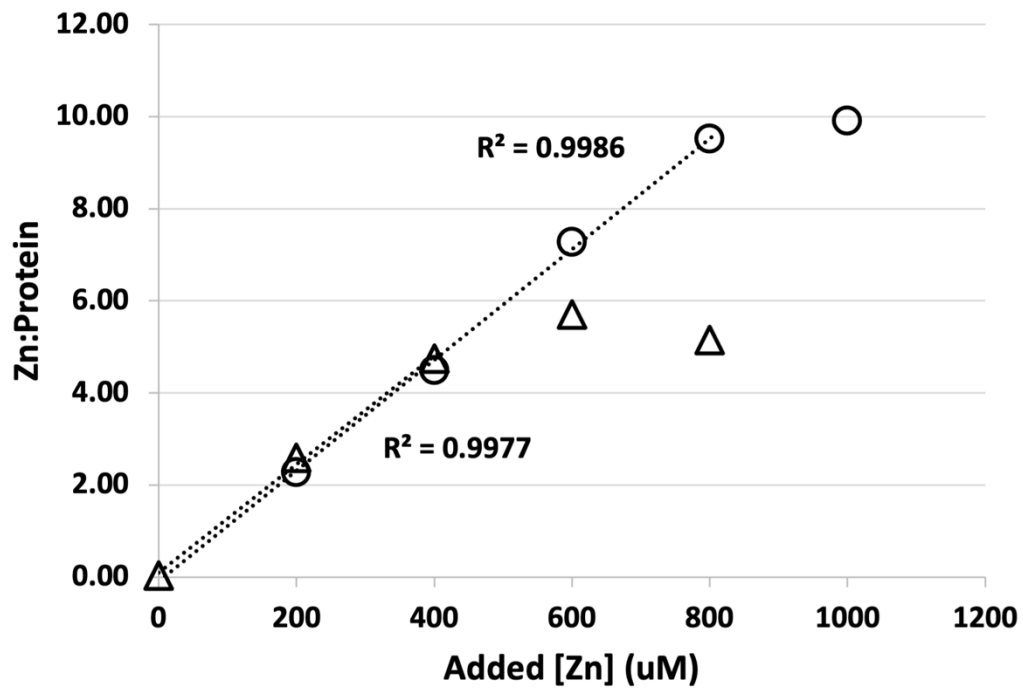

**Supplementary Figure S2.** Zinc binding to WT (circles) and  $\Delta 124-184$  ZrgA (triangles) as determined by incubation of protein with varying concentrations of zinc followed by desalting and zinc quantitation by ICP-OES. Linear fits are applied to the first 5 data points in for WT and the first 3 for  $\Delta 124-184$  ZrgA with  $R^2$  values indicated.

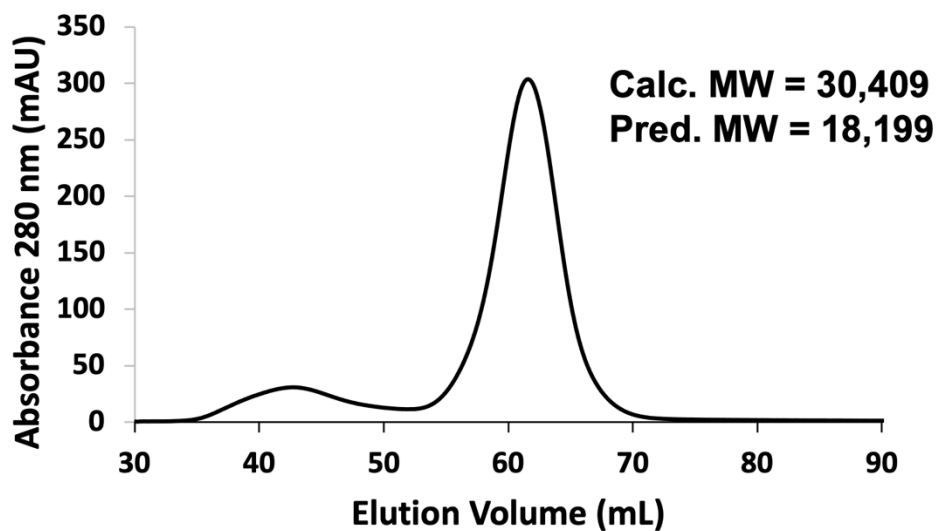

**Supplementary Figure S3.** Size exclusion chromatogram showing purification of ZrgA  $\Delta$ 124-184 and the molecular weights calculated from the elution time (*calc. MW*) and the primary sequence (*pred. MW*). The elongated structure of ZrgA likely results in a larger apparent MW than expected for a monomer that is nonetheless too small for a dimer.

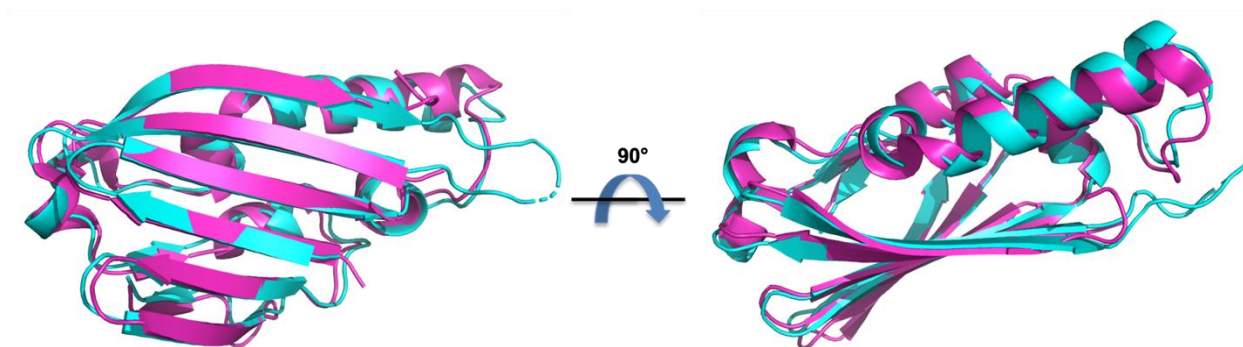

**Supplementary Figure S4.** Alignment of crystal structures of Apo PA4063 (PDB ID: 7AHW, magenta) and Apo  $\Delta$ 124-184 ZrgA (cyan). Figure created with Pymol version 2.5.4, Schrödinger, LLC.



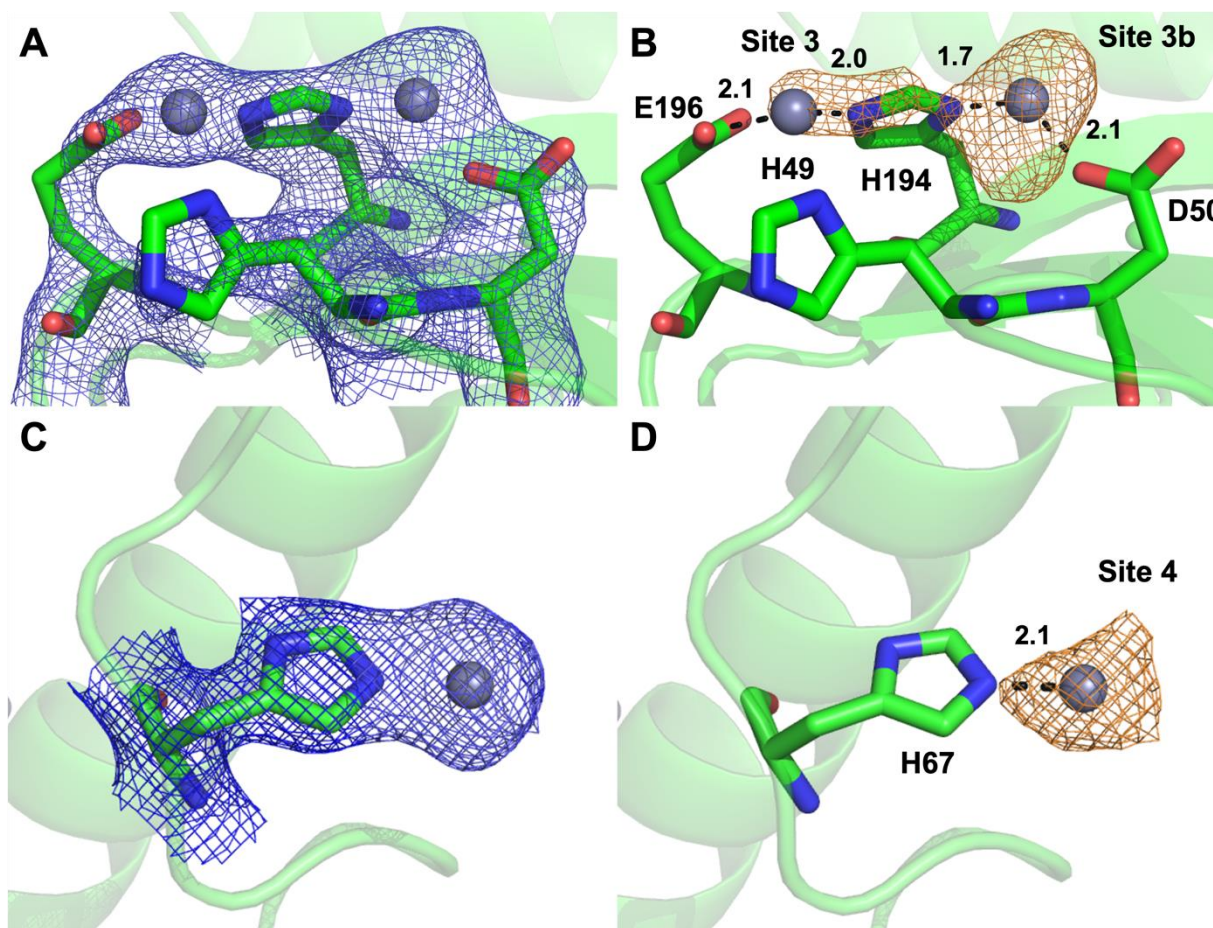

**Supplementary Figure S5.** Zinc binding sites 3b (A and B) and 4 (C and D) in  $\Delta 124-184$  Zrg showing 2Fo-Fc density contoured at  $1.0\sigma$  (blue mesh, A and C) or anomalous difference density contoured at  $2.5\sigma$  and zinc ligands with bond distances indicated in Å (orange mesh, B and D). Sites 3 and 3b are shown for the D chain, and site 4 is shown on the B chain. Figure created with Pymol version 2.5.4, Schrödinger, LLC.
